# Supplementary material
Source: publisher figshare collection journal article supplement (https://acs.figshare.com/ndownloader/files/3981040)
Supplement: Supplementary file 1 [file 3981040]

## Supporting Information for

### Solution-Processed Nanocomposites Containing Molybdenum Oxide and Gold Nanoparticles as Anode Buffer Layers in Plasmonic-Enhanced Organic Photovoltaic Devices

Kim-Shih Tan,<sup>†</sup> Ming-Kai Chuang,<sup>†</sup> Fang-Chung Chen,<sup>†,\*</sup> and Chain-Shu Hsu<sup>‡</sup>

<sup>†</sup>Department of Photonic and Display Institute, National Chiao Tung University, Hsinchu 30010, Taiwan

<sup>‡</sup>Department of Applied Chemistry, National Chiao Tung University, Hsinchu 30010, Taiwan

\*Address correspondence to fcchen@mail.nctu.edu.tw

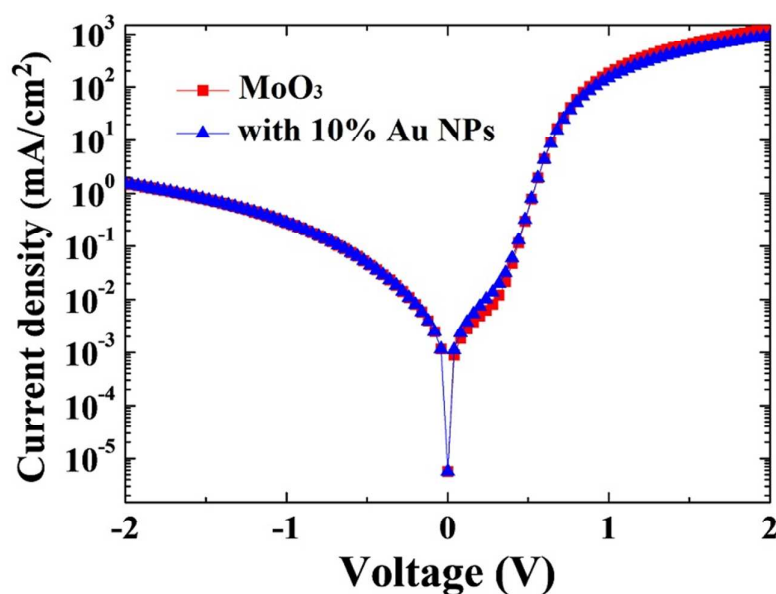

**Figure S1.**  $J$ - $V$  curves measured in the dark for the devices prepared with either MoO<sub>3</sub> or MoO<sub>3</sub> containing 10% Au NP solution.

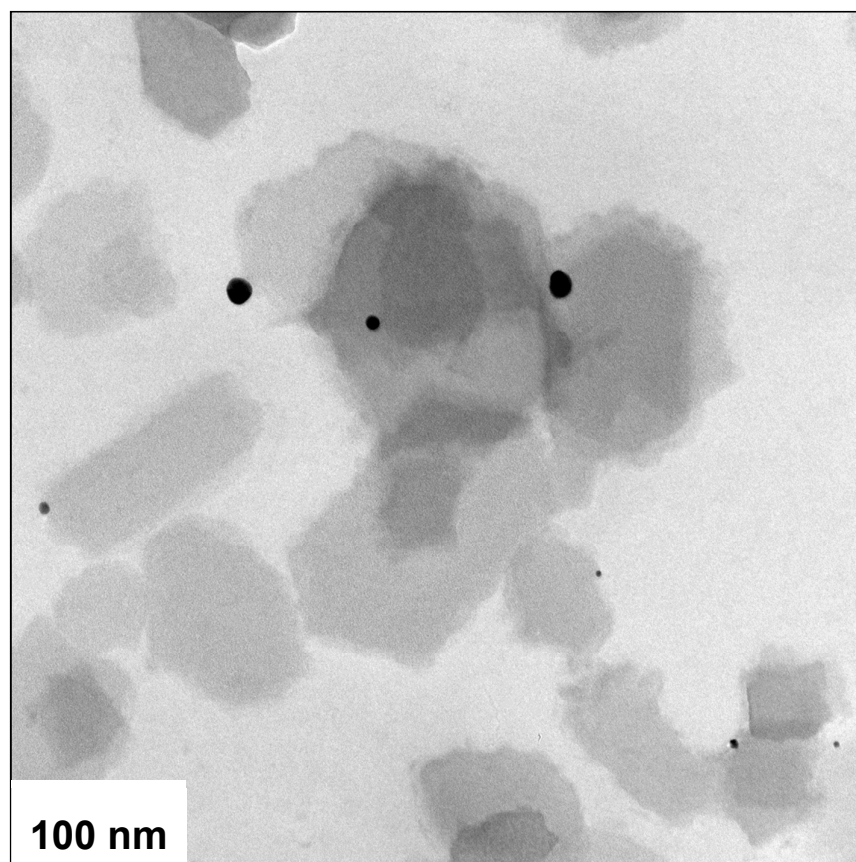

**Figure S2.** The TEM image of 10% Au NP-doped MoO<sub>3</sub>.
